# Supplementary material
Source: PubMed Central journal article supplement (PMC7529994)
Supplement: NIHMS1618480-supplement-Supplemental_Tables_S1-S4.pdf [file NIHMS1618480-supplement-Supplemental_Tables_S1-S4.pdf]

**Title:** Prediagnostic Concentrations of Circulating Bile Acids and Hepatocellular Carcinoma Risk: REVEAL-HBV and HCV Studies

**Authors:** Jessica L. Petrick, Andrea A. Florio, Jill Koshiol, Ruth M. Pfeiffer, Baiyu Yang, Kelly Yu, Chien-Jen Chen, Hwai-I Yang, Mei-Hsuan Lee, Katherine A. McGlynn

|                                                                                                                                                                                                                                                                                                                                   |          |
|-----------------------------------------------------------------------------------------------------------------------------------------------------------------------------------------------------------------------------------------------------------------------------------------------------------------------------------|----------|
| <b>Supplemental Table S1</b> .....                                                                                                                                                                                                                                                                                                | <b>2</b> |
| Spearman correlation coefficients for bile acids <sup>1</sup> among included controls from the REVEAL-HBV and REVEAL-HCV cohorts.                                                                                                                                                                                                 |          |
| <b>Supplemental Table S2</b> .....                                                                                                                                                                                                                                                                                                | <b>3</b> |
| Multivariate adjusted odds ratios (OR) and 95% confidence intervals (CI) for the associations between bile acid scores and hepatocellular carcinoma among participants of the REVEAL-HBV and REVEAL-HCV cohorts.                                                                                                                  |          |
| <b>Supplemental Table S3</b> .....                                                                                                                                                                                                                                                                                                | <b>4</b> |
| Multivariate adjusted odds ratios (ORs) and 95% confidence intervals (CIs) for the associations between bile acid concentration quartiles and hepatocellular carcinoma among participants of the REVEAL-HBV and REVEAL-HCV cohorts, excluding those below the lower limit of quantitation.                                        |          |
| <b>Supplemental Table S4</b> .....                                                                                                                                                                                                                                                                                                | <b>8</b> |
| Multivariate adjusted odds ratios (ORs) and 95% confidence intervals (CIs) for the associations between bile acid concentration quartiles and hepatocellular carcinoma among participants of the REVEAL-HBV and REVEAL-HCV cohorts, excluding those diagnosed with hepatocellular carcinoma within 5 years of the study baseline. |          |

**Supplemental Table S1.** Spearman correlation coefficients for bile acids<sup>1</sup> among included controls from the REVEAL-HBV and REVEAL-HCV cohorts.

|                                    | Primary Bile Acids |       |       |       |       |       | Secondary Bile Acids |       |       |       |       |       |        | Bile Acid Ratios |        |          |        |
|------------------------------------|--------------------|-------|-------|-------|-------|-------|----------------------|-------|-------|-------|-------|-------|--------|------------------|--------|----------|--------|
|                                    | CA                 | GCA   | TCA   | CDCA  | GCDCA | TCDC  | DCA                  | GDCA  | TDCA  | LCA   | GLCA  | TLCA  | UDCA   | GUDCA            | TUDCA  | LCA/CDCA | DCA/CA |
| Cholic Acid (CA)                   | 1.000              | 0.349 | 0.230 | 0.800 | 0.356 | 0.224 | 0.360                | 0.221 | 0.138 | 0.068 | 0.141 | 0.039 | 0.564  | 0.340            | 0.152  | -0.895   | -0.761 |
| Glycocholic Acid (GCA)             |                    | 1.000 | 0.881 | 0.283 | 0.869 | 0.841 | 0.225                | 0.683 | 0.679 | 0.212 | 0.348 | 0.353 | 0.147  | 0.596            | 0.456  | -0.297   | -0.195 |
| Taurocholic Acid (TCA)             |                    |       | 1.000 | 0.142 | 0.714 | 0.896 | 0.128                | 0.566 | 0.766 | 0.242 | 0.315 | 0.376 | 0.046  | 0.448            | 0.570  | -0.182   | -0.150 |
| Chenodeoxycholic Acid (CDCA)       |                    |       |       | 1.000 | 0.396 | 0.247 | 0.418                | 0.150 | 0.059 | 0.066 | 0.040 | 0.044 | 0.806  | 0.454            | 0.192  | -0.716   | -0.510 |
| Glycochenodeoxycholic Acid (GCDCA) |                    |       |       |       | 1.000 | 0.838 | 0.200                | 0.674 | 0.587 | 0.134 | 0.408 | 0.315 | 0.250  | 0.786            | 0.550  | -0.316   | -0.208 |
| Taurochenodeoxycholic Acid (TCDC)  |                    |       |       |       |       | 1.000 | 0.145                | 0.618 | 0.780 | 0.260 | 0.330 | 0.410 | 0.124  | 0.596            | 0.683  | -0.141   | -0.107 |
| Deoxycholic Acid (DCA)             |                    |       |       |       |       |       | 1.000                | 0.583 | 0.310 | 0.384 | 0.297 | 0.304 | 0.335  | 0.101            | -0.026 | -0.352   | 0.262  |
| Glycodeoxycholic Acid (GDCA)       |                    |       |       |       |       |       |                      | 1.000 | 0.790 | 0.255 | 0.567 | 0.435 | -0.034 | 0.375            | 0.246  | -0.193   | 0.181  |
| Taurodeoxycholic Acid (TDCA)       |                    |       |       |       |       |       |                      |       | 1.000 | 0.253 | 0.423 | 0.554 | -0.035 | 0.346            | 0.400  | -0.079   | 0.095  |
| Lithocholic Acid (LCA)             |                    |       |       |       |       |       |                      |       |       | 1.000 | 0.455 | 0.427 | 0.001  | 0.005            | 0.121  | 0.337    | 0.123  |
| Glycolithocholic Acid (GLCA)       |                    |       |       |       |       |       |                      |       |       |       | 1.000 | 0.643 | -0.073 | 0.200            | 0.300  | 0.030    | 0.073  |
| Taurolithocholic Acid (TLCA)       |                    |       |       |       |       |       |                      |       |       |       |       | 1.000 | 0.143  | 0.283            | 0.364  | 0.176    | 0.194  |
| Ursodexoycholic Acid (UDCA)        |                    |       |       |       |       |       |                      |       |       |       |       |       | 1.000  | 0.555            | 0.232  | -0.572   | -0.366 |
| Glycoursodeoxycholic Acid (GUDCA)  |                    |       |       |       |       |       |                      |       |       |       |       |       |        | 1.000            | 0.646  | -0.292   | -0.249 |
| Tauroursodeoxycholic Acid (TUDCA)  |                    |       |       |       |       |       |                      |       |       |       |       |       |        |                  | 1.000  | -0.101   | -0.134 |
| LCA/CDCA                           |                    |       |       |       |       |       |                      |       |       |       |       |       |        |                  |        | 1.000    | 0.877  |
| DCA/CA                             |                    |       |       |       |       |       |                      |       |       |       |       |       |        |                  |        |          | 1.000  |

<sup>1</sup>All bile acid concentrations were log<sub>2</sub> transformed for normality.

**Supplemental Table S2.** Multivariate adjusted odds ratios (OR) and 95% confidence intervals (CI) for the associations between bile acid scores and hepatocellular carcinoma among participants of the REVEAL-HBV and REVEAL-HCV cohorts.

|                                | REVEAL-HBV (N=346) |                |                 |              | REVEAL-HCV (N=192) <sup>1</sup> |               |                 |               |
|--------------------------------|--------------------|----------------|-----------------|--------------|---------------------------------|---------------|-----------------|---------------|
|                                | Controls<br>n=161  | Cases<br>n=185 | OR <sup>2</sup> | 95% CI       | Controls<br>n=96                | Cases<br>n=96 | OR <sup>3</sup> | 95% CI        |
| <b>Bile Acid Scores</b>        |                    |                |                 |              |                                 |               |                 |               |
| <b>Primary</b>                 |                    |                |                 |              |                                 |               |                 |               |
| Quartile 1                     | 42                 | 23             | 1.00            |              | 24                              | 13            | 1.00            |               |
| Quartile 2                     | 41                 | 37             | 1.01            | (0.43, 2.33) | 24                              | 12            | 0.77            | (0.20, 3.02)  |
| Quartile 3                     | 39                 | 54             | 1.39            | (0.62, 3.10) | 24                              | 29            | 2.45            | (0.84, 7.14)  |
| Quartile 4                     | 39                 | 71             | 1.85            | (0.84, 4.05) | 24                              | 42            | 4.06            | (1.26, 13.04) |
| P-value for trend <sup>4</sup> |                    |                |                 | 0.07         |                                 |               |                 | 0.004         |
| Continuous (log <sub>2</sub> ) |                    |                | 1.34            | (1.07, 1.69) |                                 |               | 1.95            | (1.30, 2.94)  |
| <b>Secondary</b>               |                    |                |                 |              |                                 |               |                 |               |
| Quartile 1                     | 41                 | 32             | 1.00            |              | 24                              | 15            | 1.00            |               |
| Quartile 2                     | 41                 | 59             | 3.00            | (1.32, 6.80) | 24                              | 18            | 1.23            | (0.41, 3.71)  |
| Quartile 3                     | 40                 | 37             | 0.86            | (0.37, 2.00) | 24                              | 27            | 1.52            | (0.59, 3.88)  |
| Quartile 4                     | 39                 | 57             | 1.61            | (0.73, 3.54) | 24                              | 36            | 3.69            | (1.22, 11.15) |
| P-value for trend <sup>4</sup> |                    |                |                 | 0.8          |                                 |               |                 | 0.02          |
| Continuous (log <sub>2</sub> ) |                    |                | 1.09            | (0.81, 1.47) |                                 |               | 1.55            | (1.01, 2.38)  |
| <b>All</b>                     |                    |                |                 |              |                                 |               |                 |               |
| Quartile 1                     | 42                 | 24             | 1.00            |              | 24                              | 10            | 1.00            |               |
| Quartile 2                     | 41                 | 39             | 1.56            | (0.68, 3.58) | 24                              | 16            | 1.40            | (0.37, 5.22)  |
| Quartile 3                     | 39                 | 52             | 1.82            | (0.80, 4.17) | 24                              | 31            | 3.87            | (1.23, 12.20) |
| Quartile 4                     | 39                 | 70             | 2.13            | (0.96, 4.74) | 24                              | 39            | 5.54            | (1.57, 19.57) |
| P-value for trend <sup>4</sup> |                    |                |                 | 0.1          |                                 |               |                 | 0.005         |
| Continuous (log <sub>2</sub> ) |                    |                | 1.32            | (1.03, 1.70) |                                 |               | 2.10            | (1.32, 3.36)  |

<sup>1</sup>Models with categories of <5 cases are suppressed.

<sup>2</sup>Unconditional logistic regression, adjusted for age (5-year categories), sex, baseline cirrhosis status, and HBV DNA copies at baseline (<10,000, 10,000- <1,000,000, ≤1,000,000), smoking status, HbeAg (negative, positive), alcohol habit (no, yes), BMI (continuous), education level, ALT (continuous), and diabetes status at baseline.

<sup>3</sup>Conditional logistic regression, adjusted for matching factors (age (5-year categories), sex, baseline cirrhosis status, and HCV-RNA-positive rate), smoking status, alcohol habit (no, yes), BMI (continuous), education status, HCV genotype, ALT (continuous), and diabetes status at baseline.

<sup>4</sup>P-value for trend calculated using the Wald test.

**Supplemental Table S3.** Multivariate adjusted odds ratios (ORs) and 95% confidence intervals (CIs) for the associations between bile acid concentration quartiles and hepatocellular carcinoma among participants of the REVEAL-HBV and REVEAL-HCV cohorts, excluding those below the lower limit of quantitation.

|                                           | REVEAL-HBV (N=346) |       |                 |              | REVEAL-HCV (N=192) <sup>1</sup> |       |                 |               |
|-------------------------------------------|--------------------|-------|-----------------|--------------|---------------------------------|-------|-----------------|---------------|
|                                           | Controls           | Cases | OR <sup>2</sup> | 95% CI       | Controls                        | Cases | OR <sup>3</sup> | 95% CI        |
| <b>Primary Bile Acids</b>                 |                    |       |                 |              |                                 |       |                 |               |
| <b>Cholic Acid (CA)</b>                   |                    |       |                 |              |                                 |       |                 |               |
| Quartile 1                                | 41                 | 38    | 1.00            |              | 24                              | 15    | 1.00            |               |
| Quartile 2                                | 40                 | 38    | 1.11            | (0.50, 2.50) | 24                              | 23    | 1.84            | (0.61, 5.56)  |
| Quartile 3                                | 39                 | 47    | 0.92            | (0.40, 2.11) | 24                              | 20    | 1.48            | (0.50, 4.34)  |
| Quartile 4                                | 40                 | 62    | 1.76            | (0.83, 3.75) | 24                              | 38    | 3.40            | (1.16, 9.97)  |
| P-value for trend <sup>4</sup>            |                    |       |                 | 0.1          |                                 |       |                 | 0.03          |
| <b>Glycocholic Acid (GCA)</b>             |                    |       |                 |              |                                 |       |                 |               |
| Quartile 1                                | 42                 | 16    | 1.00            |              | 24                              | 9     | 1.00            |               |
| Quartile 2                                | 40                 | 39    | 1.68            | (0.71, 4.00) | 24                              | 14    | 2.77            | (0.67, 11.43) |
| Quartile 3                                | 41                 | 47    | 1.51            | (0.64, 3.53) | 24                              | 18    | 1.78            | (0.45, 7.09)  |
| Quartile 4                                | 38                 | 83    | 3.38            | (1.48, 7.71) | 24                              | 55    | 8.16            | (2.21, 30.18) |
| P-value for trend <sup>4</sup>            |                    |       |                 | 0.004        |                                 |       |                 | <0.001        |
| <b>Taurocholic Acid (TCA)</b>             |                    |       |                 |              |                                 |       |                 |               |
| Quartile 1                                | 37                 | 20    | 1.00            |              | 21                              | 9     | 1.00            |               |
| Quartile 2                                | 38                 | 35    | 1.86            | (0.78, 4.43) | 21                              | 8     | 0.86            | (0.20, 3.75)  |
| Quartile 3                                | 38                 | 37    | 1.64            | (0.71, 3.81) | 21                              | 28    | 2.60            | (0.63, 10.64) |
| Quartile 4                                | 34                 | 88    | 2.96            | (1.28, 6.83) | 20                              | 45    | 8.03            | (2.09, 30.78) |
| P-value for trend <sup>4</sup>            |                    |       |                 | 0.02         |                                 |       |                 | <0.001        |
| <b>Chenodeoxycholic Acid (CDCA)</b>       |                    |       |                 |              |                                 |       |                 |               |
| Quartile 1                                | 40                 | 36    | 1.00            |              | 24                              | 14    | 1.00            |               |
| Quartile 2                                | 40                 | 42    | 0.86            | (0.38, 1.96) | 23                              | 27    | 2.49            | (0.86, 7.20)  |
| Quartile 3                                | 41                 | 51    | 1.62            | (0.74, 3.54) | 24                              | 15    | 1.35            | (0.41, 4.40)  |
| Quartile 4                                | 39                 | 56    | 1.53            | (0.70, 3.32) | 23                              | 40    | 3.92            | (1.41, 10.85) |
| P-value for trend <sup>4</sup>            |                    |       |                 | 0.1          |                                 |       |                 | 0.02          |
| <b>Glycochenodeoxycholic Acid (GCDCA)</b> |                    |       |                 |              |                                 |       |                 |               |
| Quartile 1                                | 42                 | 24    | 1.00            |              | 24                              | 8     | 1.00            |               |
| Quartile 2                                | 41                 | 45    | 1.32            | (0.58, 2.97) | 24                              | 14    | 2.38            | (0.50, 11.25) |

|                                           |    |    |      |              |    |    |       |                 |
|-------------------------------------------|----|----|------|--------------|----|----|-------|-----------------|
| Quartile 3                                | 41 | 41 | 1.28 | (0.56, 2.93) | 24 | 36 | 11.94 | (2.55, 55.99)   |
| Quartile 4                                | 37 | 75 | 2.20 | (0.99, 4.88) | 24 | 38 | 7.61  | (1.73, 33.44)   |
| P-value for trend <sup>4</sup>            |    |    |      | 0.05         |    |    |       | 0.007           |
| <b>Taurochenodeoxycholic Acid (TCDCA)</b> |    |    |      |              |    |    |       |                 |
| Quartile 1                                | 41 | 21 | 1.00 |              | 24 | 6  | 1.00  |                 |
| Quartile 2                                | 40 | 40 | 1.59 | (0.70, 3.65) | 24 | 11 | 1.80  | (0.45, 7.23)    |
| Quartile 3                                | 42 | 37 | 1.03 | (0.44, 2.43) | 24 | 30 | 4.67  | (1.26, 17.29)   |
| Quartile 4                                | 36 | 87 | 2.60 | (1.16, 5.83) | 24 | 49 | 7.27  | (1.99, 26.62)   |
| P-value for trend <sup>4</sup>            |    |    |      | 0.01         |    |    |       | 0.001           |
| <b>Secondary Bile Acids</b>               |    |    |      |              |    |    |       |                 |
| <b>Deoxycholic Acid (DCA)</b>             |    |    |      |              |    |    |       |                 |
| Quartile 1                                | 39 | 54 | 1.00 |              | 22 | 18 | 1.00  |                 |
| Quartile 2                                | 36 | 47 | 0.79 | (0.37, 1.68) | 21 | 15 | 0.61  | (0.18, 2.02)    |
| Quartile 3                                | 36 | 39 | 0.59 | (0.27, 1.30) | 22 | 26 | 1.08  | (0.38, 3.07)    |
| Quartile 4                                | 38 | 32 | 0.37 | (0.16, 0.82) | 21 | 28 | 1.79  | (0.51, 6.27)    |
| P-value for trend <sup>4</sup>            |    |    |      | 0.02         |    |    |       | 0.2             |
| <b>Glycodeoxycholic Acid (GDCA)</b>       |    |    |      |              |    |    |       |                 |
| Quartile 1                                | 40 | 34 | 1.00 |              | 22 | 19 | 1.00  |                 |
| Quartile 2                                | 38 | 40 | 1.10 | (0.49, 2.44) | 22 | 13 | 1.02  | (0.34, 3.07)    |
| Quartile 3                                | 38 | 33 | 0.65 | (0.28, 1.52) | 22 | 22 | 1.38  | (0.43, 4.38)    |
| Quartile 4                                | 37 | 68 | 1.47 | (0.68, 3.17) | 22 | 38 | 1.78  | (0.61, 5.20)    |
| P-value for trend <sup>4</sup>            |    |    |      | 0.4          |    |    |       | 0.3             |
| <b>Taurodeoxycholic Acid (TDCA)</b>       |    |    |      |              |    |    |       |                 |
| Quartile 1                                | 31 | 18 | 1.00 |              | 15 | 9  | 1.00  |                 |
| Quartile 2                                | 31 | 30 | 1.73 | (0.66, 4.54) | 15 | 16 | 0.92  | (0.13, 6.48)    |
| Quartile 3                                | 32 | 36 | 1.36 | (0.53, 3.46) | 15 | 21 | 1.30  | (0.20, 8.47)    |
| Quartile 4                                | 29 | 61 | 1.88 | (0.75, 4.74) | 15 | 28 | 3.63  | (0.58, 22.86)   |
| P-value for trend <sup>4</sup>            |    |    |      | 0.3          |    |    |       | 0.1             |
| <b>Lithocholic Acid (LCA)</b>             |    |    |      |              |    |    |       |                 |
| Quartile 1                                | 22 | 30 | 1.00 |              | 11 | 8  | 1.00  |                 |
| Quartile 2                                | 19 | 26 | 1.51 | (0.50, 4.59) | 11 | 16 | 3.86  | (0.04, 335.38)  |
| Quartile 3                                | 20 | 24 | 0.35 | (0.11, 1.13) | 11 | 12 | 0.47  | (0.00, 2752.14) |

|                                          |    |    |      |              |    |    |       |                  |
|------------------------------------------|----|----|------|--------------|----|----|-------|------------------|
| Quartile 4                               | 21 | 27 | 0.41 | (0.13, 1.30) | 11 | 22 | 1.10  | (0.01, 199.00)   |
| P-value for trend <sup>4</sup>           |    |    |      | 0.02         |    |    |       | 0.7              |
| <b>Glycolithocholic Acid (GLCA)</b>      |    |    |      |              |    |    |       |                  |
| Quartile 1                               | 26 | 24 | 1.00 |              | 11 | 8  | —     |                  |
| Quartile 2                               | 24 | 35 | 2.14 | (0.77, 5.93) | 10 | 18 | —     |                  |
| Quartile 3                               | 25 | 33 | 1.82 | (0.66, 5.03) | 10 | 15 | —     |                  |
| Quartile 4                               | 24 | 32 | 1.54 | (0.58, 4.08) | 10 | 17 | —     |                  |
| P-value for trend <sup>4</sup>           |    |    |      | 0.9          |    |    |       | 0.1              |
| <b>Taurolithocholic Acid (TLCA)</b>      |    |    |      |              |    |    |       |                  |
| Quartile 1                               | 9  | 27 | 1.00 |              | 3  | 4  | —     |                  |
| Quartile 2                               | 9  | 10 | 0.03 | (0.00, 0.46) | 3  | 12 | —     |                  |
| Quartile 3                               | 8  | 17 | 0.18 | (0.02, 1.35) | 3  | 5  | —     |                  |
| Quartile 4                               | 7  | 13 | 0.10 | (0.01, 0.92) | 3  | 12 | —     |                  |
| P-value for trend <sup>4</sup>           |    |    |      | 0.1          |    |    |       | <0.001           |
| <b>Ursodexoycholic Acid (UDCA)</b>       |    |    |      |              |    |    |       |                  |
| Quartile 1                               | 41 | 38 | 1.00 |              | 22 | 9  | 1.00  |                  |
| Quartile 2                               | 35 | 46 | 1.62 | (0.75, 3.53) | 21 | 21 | 5.58  | (1.28, 24.32)    |
| Quartile 3                               | 38 | 35 | 1.21 | (0.54, 2.71) | 22 | 48 | 7.81  | (2.14, 28.48)    |
| Quartile 4                               | 37 | 52 | 1.78 | (0.83, 3.80) | 21 | 10 | 2.39  | (0.58, 9.87)     |
| P-value for trend <sup>4</sup>           |    |    |      | 0.3          |    |    |       | 0.8              |
| <b>Glycoursodeoxycholic Acid (GUDCA)</b> |    |    |      |              |    |    |       |                  |
| Quartile 1                               | 41 | 26 | 1.00 |              | 23 | 14 | 1.00  |                  |
| Quartile 2                               | 40 | 47 | 1.73 | (0.75, 3.99) | 23 | 23 | 1.29  | (0.45, 3.72)     |
| Quartile 3                               | 41 | 44 | 1.84 | (0.80, 4.22) | 23 | 33 | 1.91  | (0.74, 4.88)     |
| Quartile 4                               | 37 | 68 | 2.61 | (1.15, 5.93) | 23 | 24 | 1.75  | (0.53, 5.79)     |
| P-value for trend <sup>4</sup>           |    |    |      | 0.06         |    |    |       | 0.3              |
| <b>Tauroursodeoxycholic Acid (TUDCA)</b> |    |    |      |              |    |    |       |                  |
| Quartile 1                               | 24 | 27 | 1.00 |              | 12 | 16 | 1.00  |                  |
| Quartile 2                               | 24 | 15 | 0.47 | (0.16, 1.44) | 12 | 12 | 0.32  | (0.00, 43.26)    |
| Quartile 3                               | 23 | 53 | 2.31 | (0.92, 5.80) | 12 | 16 | 1.89  | (0.06, 64.31)    |
| Quartile 4                               | 23 | 47 | 1.32 | (0.52, 3.34) | 12 | 23 | 50.98 | (0.06, 44024.85) |
| P-value for trend <sup>4</sup>           |    |    |      | 0.3          |    |    |       | 0.2              |

**Secondary/Primary Ratios****LCA/CDCA**

|                                |    |    |      |              |    |    |      |               |
|--------------------------------|----|----|------|--------------|----|----|------|---------------|
| Quartile 1                     | 21 | 37 | 1.00 |              | 11 | 13 | 1.00 |               |
| Quartile 2                     | 19 | 28 | 0.49 | (0.17, 1.37) | 11 | 20 | 2.23 | (0.12, 40.14) |
| Quartile 3                     | 20 | 27 | 0.67 | (0.22, 2.08) | 11 | 9  | 1.40 | (0.03, 56.19) |
| Quartile 4                     | 22 | 15 | 0.28 | (0.09, 0.89) | 11 | 16 | 0.70 | (0.04, 12.08) |
| P-value for trend <sup>4</sup> |    |    |      | 0.06         |    |    |      | 0.6           |

**DCA/CA**

|                                |    |    |      |              |    |    |      |              |
|--------------------------------|----|----|------|--------------|----|----|------|--------------|
| Quartile 1                     | 38 | 64 | 1.00 |              | 21 | 26 | 1.00 |              |
| Quartile 2                     | 36 | 41 | 0.64 | (0.30, 1.36) | 22 | 20 | 0.44 | (0.14, 1.41) |
| Quartile 3                     | 37 | 47 | 0.58 | (0.28, 1.20) | 21 | 21 | 1.11 | (0.36, 3.40) |
| Quartile 4                     | 38 | 20 | 0.24 | (0.10, 0.59) | 22 | 20 | 0.48 | (0.15, 1.59) |
| P-value for trend <sup>4</sup> |    |    |      | 0.005        |    |    |      | 0.4          |

<sup>1</sup>Models with categories of <5 cases are suppressed.

<sup>2</sup>Unconditional logistic regression, adjusted for age (5-year categories), sex, baseline cirrhosis status, and HBV DNA copies at baseline (<10,000, 10,000- <1,000,000, ≤1,000,000), smoking status, HbeAg (negative, positive), alcohol habit (no, yes), BMI (continuous), education level, ALT (continuous), and diabetes status at baseline.

<sup>3</sup>Conditional logistic regression, adjusted for matching factors (age (5-year categories), sex, baseline cirrhosis status, and HCV-RNA-positive rate), smoking status, alcohol habit (no, yes), BMI (continuous), education status, HCV genotype, ALT (continuous), and diabetes status at baseline.

<sup>4</sup>P-value for trend calculated using the Wald test.

**Supplemental Table S4.** Multivariate adjusted odds ratios (ORs) and 95% confidence intervals (CIs) for the associations between bile acid concentration quartiles and hepatocellular carcinoma among participants of the REVEAL-HBV and REVEAL-HCV cohorts, excluding those diagnosed with hepatocellular carcinoma within 5 years of the study baseline.

|                                         | REVEAL-HBV (N=346) |       |                 |              | REVEAL-HCV (N=192) <sup>1</sup> |       |                 |               |
|-----------------------------------------|--------------------|-------|-----------------|--------------|---------------------------------|-------|-----------------|---------------|
|                                         | Controls           | Cases | OR <sup>2</sup> | 95% CI       | Controls                        | Cases | OR <sup>3</sup> | 95% CI        |
| <b>Primary Bile Acids</b>               |                    |       |                 |              |                                 |       |                 |               |
| <b>Cholic Acid (CA)</b>                 |                    |       |                 |              |                                 |       |                 |               |
| Quartile 1                              | 42                 | 37    | 1.00            |              | 24                              | 14    | 1.00            |               |
| Quartile 2                              | 40                 | 37    | 1.22            | (0.54, 2.73) | 24                              | 21    | 1.67            | (0.55, 5.13)  |
| Quartile 3                              | 39                 | 45    | 1.05            | (0.46, 2.39) | 24                              | 20    | 1.52            | (0.51, 4.52)  |
| Quartile 4                              | 40                 | 56    | 1.80            | (0.84, 3.86) | 24                              | 38    | 3.85            | (1.25, 11.87) |
| P-value for trend <sup>4</sup>          |                    |       |                 | 0.1          |                                 |       |                 | 0.02          |
| <b>Glycocholic Acid (GCA)</b>           |                    |       |                 |              |                                 |       |                 |               |
| Quartile 1                              | 42                 | 15    | 1.00            |              | 24                              | 9     | 1.00            |               |
| Quartile 2                              | 40                 | 37    | 1.83            | (0.75, 4.45) | 24                              | 14    | 2.73            | (0.66, 11.28) |
| Quartile 3                              | 41                 | 44    | 1.51            | (0.63, 3.60) | 24                              | 17    | 1.93            | (0.49, 7.60)  |
| Quartile 4                              | 38                 | 79    | 3.70            | (1.59, 8.61) | 24                              | 53    | 8.11            | (2.20, 29.99) |
| P-value for trend <sup>4</sup>          |                    |       |                 | 0.002        |                                 |       |                 | <0.001        |
| <b>Taurocholic Acid (TCA)</b>           |                    |       |                 |              |                                 |       |                 |               |
| Quartile 1                              | 51                 | 23    | 1.00            |              | 34                              | 15    | 1.00            |               |
| Quartile 2                              | 38                 | 32    | 1.83            | (0.80, 4.18) | 21                              | 8     | 0.97            | (0.29, 3.30)  |
| Quartile 3                              | 38                 | 35    | 1.69            | (0.76, 3.75) | 21                              | 28    | 2.58            | (0.81, 8.15)  |
| Quartile 4                              | 34                 | 85    | 3.26            | (1.50, 7.08) | 20                              | 42    | 5.01            | (1.84, 13.65) |
| P-value for trend <sup>4</sup>          |                    |       |                 | 0.007        |                                 |       |                 | 0.001         |
| <b>Chenodeoxycholic Acid (CDCA)</b>     |                    |       |                 |              |                                 |       |                 |               |
| Quartile 1                              | 41                 | 36    | 1.00            |              | 26                              | 11    | 1.00            |               |
| Quartile 2                              | 40                 | 39    | 0.75            | (0.33, 1.74) | 23                              | 27    | 3.89            | (1.21, 12.50) |
| Quartile 3                              | 41                 | 49    | 1.55            | (0.71, 3.42) | 24                              | 15    | 2.41            | (0.72, 8.15)  |
| Quartile 4                              | 39                 | 51    | 1.51            | (0.69, 3.28) | 23                              | 40    | 5.53            | (1.88, 16.27) |
| P-value for trend <sup>4</sup>          |                    |       |                 | 0.1          |                                 |       |                 | 0.01          |
| <b>Glychenodeoxycholic Acid (GCDCA)</b> |                    |       |                 |              |                                 |       |                 |               |
| Quartile 1                              | 42                 | 22    | 1.00            |              | 24                              | 8     | 1.00            |               |
| Quartile 2                              | 41                 | 43    | 1.37            | (0.60, 3.13) | 24                              | 14    | 2.90            | (0.61, 13.78) |
| Quartile 3                              | 41                 | 38    | 1.28            | (0.55, 2.98) | 24                              | 35    | 16.50           | (3.16, 86.14) |



|                                           |     |     |      |              |    |    |      |               |
|-------------------------------------------|-----|-----|------|--------------|----|----|------|---------------|
| Quartile 4                                | 37  | 72  | 2.41 | (1.07, 5.42) | 24 | 36 | 8.29 | (1.83, 37.58) |
| P-value for trend <sup>4</sup>            |     |     |      | 0.03         |    |    |      | 0.009         |
| <b>Taurochenodeoxycholic Acid (TCDCA)</b> |     |     |      |              |    |    |      |               |
| Quartile 1                                | 43  | 19  | 1.00 |              | 24 | 6  | 1.00 |               |
| Quartile 2                                | 40  | 36  | 1.83 | (0.78, 4.28) | 24 | 11 | 1.92 | (0.48, 7.72)  |
| Quartile 3                                | 42  | 36  | 1.27 | (0.54, 3.03) | 24 | 30 | 5.09 | (1.36, 19.03) |
| Quartile 4                                | 36  | 84  | 3.24 | (1.44, 7.33) | 24 | 46 | 7.21 | (1.96, 26.51) |
| P-value for trend <sup>4</sup>            |     |     |      | 0.005        |    |    |      | 0.002         |
| <b>Secondary Bile Acids</b>               |     |     |      |              |    |    |      |               |
| <b>Deoxycholic Acid (DCA)</b>             |     |     |      |              |    |    |      |               |
| Quartile 1                                | 51  | 66  | 1.00 |              | 32 | 25 | 1.00 |               |
| Quartile 2                                | 36  | 41  | 0.86 | (0.42, 1.76) | 21 | 15 | 0.56 | (0.19, 1.66)  |
| Quartile 3                                | 36  | 36  | 0.66 | (0.31, 1.40) | 22 | 25 | 1.14 | (0.46, 2.84)  |
| Quartile 4                                | 38  | 32  | 0.41 | (0.19, 0.89) | 21 | 28 | 2.29 | (0.86, 6.09)  |
| P-value for trend <sup>4</sup>            |     |     |      | 0.02         |    |    |      | 0.06          |
| <b>Glycodeoxycholic Acid (GDCA)</b>       |     |     |      |              |    |    |      |               |
| Quartile 1                                | 48  | 44  | 1.00 |              | 30 | 22 | 1.00 |               |
| Quartile 2                                | 38  | 35  | 0.92 | (0.43, 1.97) | 22 | 13 | 0.86 | (0.31, 2.37)  |
| Quartile 3                                | 38  | 31  | 0.60 | (0.27, 1.33) | 22 | 21 | 1.21 | (0.43, 3.45)  |
| Quartile 4                                | 37  | 65  | 1.36 | (0.66, 2.79) | 22 | 37 | 2.47 | (0.98, 6.23)  |
| P-value for trend <sup>4</sup>            |     |     |      | 0.3          |    |    |      | 0.04          |
| <b>Taurodeoxycholic Acid (TDCA)</b>       |     |     |      |              |    |    |      |               |
| Quartile 1                                | 69  | 54  | 1.00 |              | 51 | 30 | 1.00 |               |
| Quartile 2                                | 31  | 26  | 1.43 | (0.66, 3.09) | 15 | 16 | 1.47 | (0.53, 4.12)  |
| Quartile 3                                | 32  | 36  | 1.08 | (0.51, 2.26) | 15 | 21 | 1.96 | (0.71, 5.43)  |
| Quartile 4                                | 29  | 59  | 1.52 | (0.74, 3.13) | 15 | 26 | 3.47 | (1.16, 10.38) |
| P-value for trend <sup>4</sup>            |     |     |      | 0.3          |    |    |      | 0.03          |
| <b>Lithocholic Acid (LCA)</b>             |     |     |      |              |    |    |      |               |
| Quartile 1                                | 101 | 102 | 1.00 |              | 63 | 44 | 1.00 |               |
| Quartile 2                                | 19  | 24  | 1.44 | (0.63, 3.28) | 11 | 16 | 2.37 | (0.82, 6.81)  |
| Quartile 3                                | 20  | 24  | 0.54 | (0.23, 1.29) | 11 | 12 | 1.59 | (0.51, 4.95)  |
| Quartile 4                                | 21  | 25  | 0.52 | (0.22, 1.24) | 11 | 21 | 3.36 | (1.15, 9.76)  |
| P-value for trend <sup>4</sup>            |     |     |      | 0.06         |    |    |      | 0.04          |

**Glycolithocholic Acid (GLCA)**

|            |    |    |      |              |    |    |      |               |
|------------|----|----|------|--------------|----|----|------|---------------|
| Quartile 1 | 88 | 80 | 1.00 |              | 66 | 45 | 1.00 |               |
| Quartile 2 | 24 | 34 | 1.31 | (0.59, 2.92) | 10 | 17 | 2.51 | (0.83, 7.60)  |
| Quartile 3 | 25 | 32 | 1.20 | (0.55, 2.62) | 10 | 15 | 2.19 | (0.69, 6.99)  |
| Quartile 4 | 24 | 29 | 1.09 | (0.51, 2.34) | 10 | 16 | 4.79 | (1.30, 17.69) |

P-value for trend<sup>4</sup>

0.9

0.02

**Taurolithocholic Acid (TLCA)**

|            |     |     |      |              |    |    |   |  |
|------------|-----|-----|------|--------------|----|----|---|--|
| Quartile 1 | 137 | 137 | 1.00 |              | 87 | 66 | — |  |
| Quartile 2 | 9   | 9   | 0.64 | (0.20, 2.05) | 3  | 11 | — |  |
| Quartile 3 | 8   | 17  | 1.25 | (0.40, 3.89) | 3  | 5  | — |  |
| Quartile 4 | 7   | 12  | 0.80 | (0.23, 2.76) | 3  | 11 | — |  |

P-value for trend<sup>4</sup>

0.9

0.003

**Ursodexoycholic Acid (UDCA)**

|            |    |    |      |              |    |    |      |               |
|------------|----|----|------|--------------|----|----|------|---------------|
| Quartile 1 | 51 | 49 | 1.00 |              | 32 | 15 | 1.00 |               |
| Quartile 2 | 35 | 45 | 1.74 | (0.82, 3.68) | 21 | 20 | 2.75 | (0.85, 8.88)  |
| Quartile 3 | 38 | 31 | 1.20 | (0.54, 2.65) | 22 | 48 | 5.01 | (1.79, 14.02) |
| Quartile 4 | 37 | 50 | 1.96 | (0.94, 4.07) | 21 | 10 | 2.01 | (0.59, 6.87)  |

P-value for trend<sup>4</sup>

0.2

0.7

**Glycoursodeoxycholic Acid (GUDCA)**

|            |    |    |      |              |    |    |      |              |
|------------|----|----|------|--------------|----|----|------|--------------|
| Quartile 1 | 43 | 26 | 1.00 |              | 27 | 15 | 1.00 |              |
| Quartile 2 | 40 | 40 | 1.68 | (0.73, 3.89) | 23 | 23 | 1.50 | (0.57, 3.99) |
| Quartile 3 | 41 | 44 | 2.12 | (0.93, 4.84) | 23 | 32 | 2.34 | (0.94, 5.82) |
| Quartile 4 | 37 | 65 | 3.09 | (1.37, 6.97) | 23 | 23 | 2.04 | (0.66, 6.34) |

P-value for trend<sup>4</sup>

0.009

0.2

**Tauroursodeoxycholic Acid (TUDCA)**

|            |    |    |      |              |    |    |      |               |
|------------|----|----|------|--------------|----|----|------|---------------|
| Quartile 1 | 91 | 63 | 1.00 |              | 60 | 45 | 1.00 |               |
| Quartile 2 | 24 | 15 | 0.70 | (0.28, 1.75) | 12 | 12 | 0.94 | (0.33, 2.68)  |
| Quartile 3 | 23 | 53 | 3.31 | (1.60, 6.83) | 12 | 15 | 1.31 | (0.46, 3.74)  |
| Quartile 4 | 23 | 44 | 1.96 | (0.94, 4.09) | 12 | 21 | 3.41 | (1.16, 10.08) |

P-value for trend<sup>4</sup>

0.01

0.03

**Secondary/Primary Ratios****LCA/CDCA**

|            |     |     |      |              |    |    |      |              |
|------------|-----|-----|------|--------------|----|----|------|--------------|
| Quartile 1 | 100 | 107 | 1.00 |              | 63 | 50 | 1.00 |              |
| Quartile 2 | 19  | 27  | 0.83 | (0.37, 1.87) | 11 | 19 | 1.43 | (0.47, 4.31) |

|                                |    |    |      |              |    |    |      |              |
|--------------------------------|----|----|------|--------------|----|----|------|--------------|
| Quartile 3                     | 20 | 26 | 1.02 | (0.45, 2.33) | 11 | 9  | 1.73 | (0.55, 5.45) |
| Quartile 4                     | 22 | 15 | 0.35 | (0.13, 0.95) | 11 | 15 | 1.38 | (0.50, 3.80) |
| P-value for trend <sup>4</sup> |    |    |      | 0.07         |    |    |      | 0.5          |
| <b>DCA/CA</b>                  |    |    |      |              |    |    |      |              |
| Quartile 1                     | 50 | 73 | 1.00 |              | 31 | 34 | 1.00 |              |
| Quartile 2                     | 36 | 37 | 0.70 | (0.34, 1.45) | 22 | 19 | 0.55 | (0.20, 1.46) |
| Quartile 3                     | 37 | 45 | 0.66 | (0.33, 1.32) | 21 | 20 | 1.45 | (0.55, 3.83) |
| Quartile 4                     | 38 | 20 | 0.28 | (0.12, 0.67) | 22 | 20 | 0.69 | (0.26, 1.80) |
| P-value for trend <sup>4</sup> |    |    |      | 0.006        |    |    |      | 0.7          |

<sup>1</sup>Models with categories of <5 cases are suppressed.

<sup>2</sup>Unconditional logistic regression, adjusted for age (5-year categories), sex, baseline cirrhosis status, and HBV DNA copies at baseline (<10,000, 10,000- <1,000,000, ≤1,000,000), smoking status, HbeAg (negative, positive), alcohol habit (no, yes), BMI (continuous), and education level.

<sup>3</sup>Conditional logistic regression, adjusted for matching factors (age (5-year categories), sex, baseline cirrhosis status, and HCV-RNA-positive rate), smoking status, alcohol habit (no, yes), BMI (continuous), education status, and HCV genotype.

<sup>4</sup>P-value for trend calculated using the Wald test.
